# Supplementary material for: Update on the Brassicaceae species checklist
Source: PubMed Central journal article supplement (PMC7952366; doi:10.3897/bdj.9.e58773), 2021-03-04
Supplement: bdj-09-e58773-s001.pdf [file bdj-09-e58773-s001.pdf]

## Additional References:

Alexander PJ, Windham MD, Govindarajulu R, Al-Shehbaz IA, Baley CD (2010) Molecular Phylogenetics and Taxonomy of the Genus *Thysanocarpus* (Brassicaceae). *Systematic Botany* 35 (3): 559-577. <https://doi.org/10.1600/036364410792495926>

Al-Shehbaz IA (2006) The genus *Sisymbrium* in South America, with synopses of the genera *Chilocardamum*, *Mostacillastrum*, *Neuontobotrys*, and *Polypsecadium* (Brassicaceae). *Darwiniana* 44: 341-358. <http://www.ojs.darwin.edu.ar/index.php/darwiniana/article/view/110/99>

Al-Shehbaz IA, Mutlu B, Dönmez AA (2007) The Brassicaceae (Cruciferae) of Turkey, Updated. *Turkish Journal of Botany* 31: 327-336. <https://journals.tubitak.gov.tr/botany/abstract.htm?id=9033>

Al-Shehbaz IA (2009) Two New North American Species of *Draba* (Brassicaceae): *D. Heilii* from New Mexico and *D. Mulliganii* from Alaska. *Harvard Papers in Botany* 14(1): 83-86. <https://doi.org/10.3100/025.014.0112>

Al-Shehbaz IA, Windham MD (2009) New and noteworthy North American *Draba* (Brassicaceae). *Harvard Papers in Botany* 12:409-419. [https://doi.org/https://doi.org/10.3100/1043-4534\(2007\)12\[409:nonnad\]2.0.co;2](https://doi.org/https://doi.org/10.3100/1043-4534(2007)12[409:nonnad]2.0.co;2)

Al-Shehbaz IA (2010) A Synopsis of the Genus *Sibara* (Brassicaceae). *Harvard Papers in Botany* 15 (1): 139-147. <https://doi.org/10.3100/025.015.0107>

Al-Shehbaz IA, Mummenhoff K (2011) *Stubendorffia* and *Winklera* belong to the expanded *Lepidium* (Brassicaceae). *Edinburgh Journal of Botany* 68:165-171. <https://doi.org/https://doi.org/10.1017/s0960428611000060>

Al-Shehbaz IA (2012) A Synopsis of the South American *Descurainia* and Description of the Colombian New Species *D. cleefii* (Brassicaceae). *Harvard Papers in Botany* 17 (2): 221-229. <https://doi.org/10.3100/025.017.0202>

Al-Shehbaz IA (2013a) A Revision of the Central American Genus *Romanschulzia* (Brassicaceae). *Harvard Papers in Botany* 18(1): 1-12. <https://doi.org/10.3100/025.018.0102>

Al-Shehbaz IA (2013b) *Clypeola* is United with *Alyssum* (Brassicaceae). *Harvard Papers in Botany* 18(2): 125-128. <https://doi.org/10.3100/025.018.0204>

Al-Shehbaz IA, Mayer MS (2013) New or Noteworthy *Streptanthus* (Brassicaceae) for the Flora of North America. *Novon* 18: 279-282. <https://doi.org/10.3417/2007163>

Al-Shehbaz IA, Cano A, Manchego MAC, Salariato DL (2018) Remarkable discoveries in the long-neglected and peruvian-endemic genus *Machaerophorus* (Brassicaceae). *Phytotaxa* 360 (2):114-124. <https://doi.org/10.11646/phytotaxa.360.2.3>

Bailey CD, Al-Shehbaz IA, Rajanikanth G (2007) Generic limits in tribe Halimolobeae and description of the new genus *Exhalimolobos* (Brassicaceae). *Systematic Botany* 32: 140–156. <https://doi.org/10.1600/036364407780360166>

Çetin Ö, Duran A, Martin E, Tuştaş S (2012) A taxonomic study of the genus *Fibigia* Medik. (Brassicaceae). *Afr. J. Biotechnol.* 11; 109–119. <https://www.ajol.info/index.php/ajb/article/view/93046>

de Lange PJ, Heenan PB, Houlston GJ, Rolfe JR, Mitchell AD (2013) New *Lepidium* (Brassicaceae) from New Zealand. *Phytokeys* 24: 1–147. <https://doi.org/10.3897/phytokeys.24.4375>

Esmailbegi S, Lysak MA, Rahiminejad MR, Mirtadzadini M, Mummernhoff K, Al-Shehbaz IA (2017b) A taxonomic revision of the genus *Graellsia* (Brassicaceae, tribe Thlaspidaceae). *Phytotaxa* 313(1): 105–116. <https://doi.org/10.11646/phytotaxa.313.1.7>

German DA, Al-Shehbaz IA (2008) *Dendroarabis*, A Newasian Genus of Brassicaceae. *Harvard Papers in Botany* 13 (2): 289–291. <https://doi.org/10.3100/1043-4534-13.2.289>

German DA (2013) Proposal to conserve the name *Alyssum canescens* (*Ptilotrichum canescens*, *Stevenia canescens*) (Cruciferae) with a conserved type. *Taxon* 62: 836–837. <https://doi.org/https://doi.org/10.12705/624.18>

German DA (2014) New synonyms and combinations in Eurasian Brassicaceae (Cruciferae). *Phytotaxa* 173 (1): 31–40. <https://doi.org/10.11646/phytotaxa.173.1.2>

German DA, Al-Shehbaz IA (2015) Proposal to conserve the name *Sisymbrium pumilum* Stephan, non Lam. (*Calymmatium pumilum*, *Olimarabidopsis pumila*, *Thellungiella pumila*) (Cruciferae). *Taxon* 64 (4): 849–850. <https://doi.org/10.12705/644.21>

German DA (2016) Taxonomic notes on miscellaneous Cruciferae. *Turczaninowia* 19: 129–135. <https://doi.org/https://doi.org/10.14258/turczaninowia.19.4.17>

German DA, Tekin M, Španiel S, Marhold K, Al-Shehbaz IA (2016) A brief taxonomic revision of *Physoptychis* (Alysseae, Brassicaceae). *Phytotaxa* 258 (1): 75–82. <https://doi.org/10.11646/phytotaxa.258.1.5>

Hall JC, Tisdale TE, Donohue K, Wheeler A, Al-Yahya MA, Kramer EM (2011) Convergent evolution of a complex fruit structure in the tribe Brassiceae (Brassicaceae). *American Journal of Botany* 98 (12): 1989–2003. <https://doi.org/10.3732/ajb.1100203>

Heenan PB, Goeke DF, Houlston GJ, Lysak MA (2012) Phylogenetic analyses of ITS and rbcL DNA sequences for sixteen genera of Australian and New Zealand Brassicaceae result in the expansion of the tribe Microlepidieae. *Taxon* 61 (5): 970–979. <https://doi.org/10.1002/tax.615004>

Heenan PB (2017) A taxonomic revision of *Cardamine* L. (brassicaceae) in New Zealand. *Phytotaxa* 330 (1): 1–154. <https://doi.org/10.11646/phytotaxa.330.1.1>

Hu H, Al-Shehbaz IA, Sun Y, Hao G, Wang Q, Liu J (2015) Species delimitation in *Orychophragmus* (Brassicaceae) based on chloroplast and nuclear DNA barcodes. *Taxon* 64 (4): 714-726. <https://doi.org/10.12705/644.4>

Koch MA, Al-Shehbaz IA (2009). Molecular systematics and evolution: Recognition of infrafamiliar taxa: the tribal system. In Gupta SK *Biology and breeding of crucifers*. CRC Press.

Mandáková T, Mummernhoff K, Al-Shehbaz IA, Mucina L, Mühlhausen A, Lysak MA (2012) Whole-genome triplication and species radiation in the southern African tribe Heliophileae (Brassicaceae). *Taxon* 61:989-1000. <https://doi.org/10.1002/tax.615006>

Marhold K (2011) Brassicaceae. In: Euro+Med Plantbase - the information resource for Euro-Mediterranean plant diversity. <http://ww2.bgbm.org/EuroPlusMed/>. Accessed on: 2016-11-14.

Marhold K, Šlenker M, Kudoh H, Zozomová-Lihová J (2016) *Cardamine occulta*, the correct species name for invasive Asian plants previously classified as *C. flexuosa*, and its occurrence in Europe. *PhytoKeys* 62(1): 57-72. <https://doi.org/10.3897/phytokeys.62.7865>

Parolly G, Nordt B, Bleeker W, Mummenhoff K (2010) *Heldreichia* Boiss. (Brassicaceae) revisited: A morphological and molecular study. *Taxon* 59 (1): 187-202. <https://doi.org/10.1002/tax.591018>

Prina AO, Martínez-Laborde JB (2008) A taxonomic review of *Crambe*, sect. *Dendrocrambe* (Brassicaceae). *Botanical Journal of the Linnean Society*. 156: 291–304. <https://doi.org/10.1111/j.1095-8339.2007.00708.x>

Prina, AO (2009) Taxonomic review of the genus *Crambe*, sect. *Crambe* (Brassicaceae, Brassiceae). *Anal. Jard. Bot. Madrid* 66: 7–24. <https://doi.org/10.3989/ajbm.2186>

Ranjbar M, Karami S, Rostami M (2008) A revision of *Fibigia* sect. *Purpureae* (Brassicaceae, Alysseae) in Iran, and the description of three new species. *Biological Diversity and Conservation* 7 (1):32-43. <https://doi.org/10.11646/phytotaxa.258.1.5>

Salariato DL, Zuloaga FO, Al-Shehbaz IA. (2015a) A taxonomic revision of the genus *Xerodraba* (Eudemeae, Brassicaceae). *Phytotaxa* 207 (1): 39-67. <https://doi.org/10.11646/phytotaxa.207.1.2>

Salariato DL, Zuloaga FO, Cano A, Al-Shehbaz IA (2015b) Molecular phylogenetics of tribe Eudemeae (Brassicaceae) and implications for its morphology and distribution. *Molecular Phylogenetics and Evolution* 82 (PA): 43-59. <https://doi.org/10.1016/j.ympev.2014.09.030>

Salariato DL, Zuloaga FO, Frankze A, Mummenhoff K, Al-Shehbaz IA (2016). Diversification patterns in the CES clade (Brassicaceae tribes Cremolobaeae, Eudemeae, Schizopetaleae) in Andean South America. *Botanical Journal of the Linnean Society* 181(4): 543-566. <https://doi.org/10.1111/boj.12430>

Warwick SI, Francis A, Al-Shehbaz IA (2006) Brassicaceae: Species checklist and database on CD-Rom. *Pl. Syst. Evol.* 259: 249-258. <https://doi.org/10.1007/s00606-006-0422-0>

Windham MD, Al-Shehbaz IA (2006) New and noteworthy species of *Boechea* (Brassicaceae) I: sexual diploids. Harvard Papers in Botany 11(1): 61-88.

[https://doi.org/10.3100/1043-4534\(2006\)11\[61:NANSOB\]2.0.CO;2](https://doi.org/10.3100/1043-4534(2006)11[61:NANSOB]2.0.CO;2)

Windham MD (2007a) New and noteworthy species of *Boechea* (Brassicaceae) II: Apomictic hybrids. Harvard Papers in Botany 11: 257-274.

[https://doi.org/10.3100/1043-4534\(2007\)11\[257:NANSOB\]2.0.CO;2](https://doi.org/10.3100/1043-4534(2007)11[257:NANSOB]2.0.CO;2)

Windham MD (2007b) New and noteworthy species of *Boechea* (Brassicaceae) III: Additional sexual diploids and apomictic hybrids. Harvard Papers in Botany 12: 235-257.

[https://doi.org/10.3100/1043-4534\(2007\)12\[235:NANSOB\]2.0.CO;2](https://doi.org/10.3100/1043-4534(2007)12[235:NANSOB]2.0.CO;2)

Yue J, Sun H, Li J, Al-Shehbaz IA (2008) A Synopsis Of An Expanded *Solms-laubachia* (Brassicaceae), and the Description Of Four New Species From Western China 1. Annals of the Missouri Botanical Garden 95 (3): 520-538. <https://doi.org/10.3417/2006214>

Zozomová-Lihová J, Marhold K, Španiel S (2014) Taxonomy and evolutionary history of *Alyssum montanum* (Brassicaceae) and related taxa in southwestern Europe and Morocco: Diversification driven by polyploidy, geographic and ecological isolation. Taxon 63(3): 562-591.

<https://doi.org/10.12705/633.18>
